# Supplementary material
Source: MDPI journal article supplement (https://www.mdpi.com/2073-4344/12/7/721)
Supplement: s1 [file s1]

# High-Performance Hydrogel Based on Modified Chitosan for Removal of Heavy Metal Ions in Borehole: A Case Study from the Bahariya Oasis, Egypt

Mohammed F. Hamza <sup>1,2,\*</sup>, Saad H. Alotaibi <sup>3</sup>, Yuezhou Wei <sup>1,4,\*</sup> and Noha M. Mashaal <sup>5,\*</sup>

<sup>1</sup> School of Nuclear Science and Technology, University of South China, Hengyang 421001, China

<sup>2</sup> Nuclear Materials Authority, P.O. Box 530, El-Maadi, Cairo 11728, Egypt

<sup>3</sup> Department of Chemistry, Turabah University College, Taif University, Taif 21944, Saudi Arabia; s.alosaimi@tu.edu.sa

<sup>4</sup> School of Nuclear Science and Engineering, Shanghai Jiao Tong University, Shanghai, (200240), China

<sup>5</sup> Department of Geology, Faculty of Science, Menoufia University, Shibin El-Kom, (32511), Egypt

\* Correspondence: m\_fouda21@hotmail.com (M.F.H.); yzwei@sjtu.edu.cn (Y.W.); noha.mashal@science.menofia.edu.eg (N.M.M.); Tel.: +20-111-668-1228 (M.F.H.); +86-771-322-4990 (Y.W.); +2-01003051898 (N.M.M.)

**Table S1a.** Reminder on equations used for modeling uptake kinetics [1-3].

| Model | Equation                                                                                                                                                                                                                                                                                         | Parameters                                                                                                                                               | Ref. |
|-------|--------------------------------------------------------------------------------------------------------------------------------------------------------------------------------------------------------------------------------------------------------------------------------------------------|----------------------------------------------------------------------------------------------------------------------------------------------------------|------|
| PFORE | $q(t) = q_{eq,1}(1 - e^{-k_1 t})$                                                                                                                                                                                                                                                                | $q_{eq,1}$ (mmol g <sup>-1</sup> ): sorption capacity at equilibrium<br>$k_1$ (min <sup>-1</sup> ): apparent rate constant of PFORE                      | [2]  |
| PSORE | $q(t) = \frac{q_{eq,2}^2 k_2 t}{1 + k_2 q_{eq,2} t}$                                                                                                                                                                                                                                             | $q_{eq,2}$ (mmol g <sup>-1</sup> ): sorption capacity at equilibrium<br>$k_2$ (g mmol <sup>-1</sup> min <sup>-1</sup> ): apparent rate constant of PSORE | [2]  |
| RIDE  | $\frac{q(t)}{q_{eq}} = 1 - \sum_{n=1}^{\infty} \frac{6\alpha(\alpha + 1)\exp\left(\frac{-D_e q_n^2}{r^2} t\right)}{9 + 9\alpha + q_n^2 \alpha^2}$<br>With $q_n$ being the non-zero roots of<br>$\tan q_n = \frac{3 q_n}{3 + \alpha q_n^2} \text{ and } \frac{m q}{V C_0} = \frac{1}{1 + \alpha}$ | $D_e$ (m <sup>2</sup> min <sup>-1</sup> ): Effective diffusivity coefficient                                                                             | [3]  |

(m (g): mass of sorbent; V (L): volume of solution;  $C_0$  (mmol L<sup>-1</sup>): initial concentration of the solution).

**Table S1b.** Reminder on equations used for modeling sorption isotherms [1,4,5].

| Model      | Equation                                                             | Parameters                                                                                                                             | Ref. |
|------------|----------------------------------------------------------------------|----------------------------------------------------------------------------------------------------------------------------------------|------|
| Langmuir   | $q_{eq} = \frac{q_{m,L}C_{eq}}{1 + b_L C_{eq}}$                      | $q_{m,L}$ (mmol g <sup>-1</sup> ): Sorption capacity at saturation of monolayer<br>$b_L$ (L mmol <sup>-1</sup> ): Affinity coefficient | [4]  |
| Freundlich | $q_{eq} = k_F C_{eq}^{1/n_F}$                                        | $k_F$ and $n_F$ : empirical parameters of Freundlich equation                                                                          | [5]  |
| Sips       | $q_{eq} = \frac{q_{m,S} b_S C_{eq}^{1/n_S}}{1 + b_S C_{eq}^{1/n_S}}$ | $q_{m,L}$ , $b_S$ and $n_S$ : empirical parameters of Sips equation (based on Langmuir and Freundlich equations)                       | [1]  |

Akaike Information Criterion, AIC:

$$AIC = N \ln \left( \frac{\sum_{i=0}^N (y_{i,exp.} - y_{i,model})^2}{N} \right) + 2N_p + \frac{2N_p(N_p + 1)}{N - N_p - 1}$$

Where N is the number of experimental points,  $N_p$  the number of model parameters,  $y_{i,exp.}$  and  $y_{i,model}$  the experimental and calculated values of the tested variable.

**Table S2.** Comparison study of initial and final concentration of metal ions on water sample before and after sorption

| Limited concentration |       |   |     | Light condition |       |       |       |       |       |       |       |       | UV emission |       |       |       |       |        |
|-----------------------|-------|---|-----|-----------------|-------|-------|-------|-------|-------|-------|-------|-------|-------------|-------|-------|-------|-------|--------|
|                       |       |   |     | Initial         |       |       | pH3   |       |       | pH5   |       |       | pH3         |       |       | pH5   |       |        |
|                       |       |   |     | D.W             | I.W   | L.D.W | D.W   | I.W   | L.D.W | D.W   | I.W   | L.D.W | D.W         | I.W   | L.D.W | D.W   | I.W   | L.D.W  |
| Fe                    | 0.3   | 5 |     | 590             | 35.4  |       | 25.33 | 1.52  |       | 4.3   | 0.258 |       | 10.33       | 0.62  |       | 1.6   | 0.096 |        |
| Zn                    | 5     | 2 | 24  | 2.26            | 5.65  | 0.471 | 0.866 | 2.165 | 0.181 | 0.312 | 0.78  | 0.065 | 0.774       | 1.935 | 0.161 | 0.212 | 0.53  | 0.0442 |
| Cd                    | 0.009 |   |     | 33.33           |       |       | 13.33 |       |       | 4.444 |       |       | 10.89       |       |       | 1.111 |       |        |
| Pb                    | 0.005 | 5 | 0.1 | 156             | 0.156 | 7.8   | 42    | 0.042 | 2.1   | 8     | 0.008 | 0.4   | 22          | 0.022 | 1.1   | 2     | 0.002 | 0.1    |

**D.W. drinking water**

**I.W. Irrigation water**

**L.D.W. Livestock drinking water**

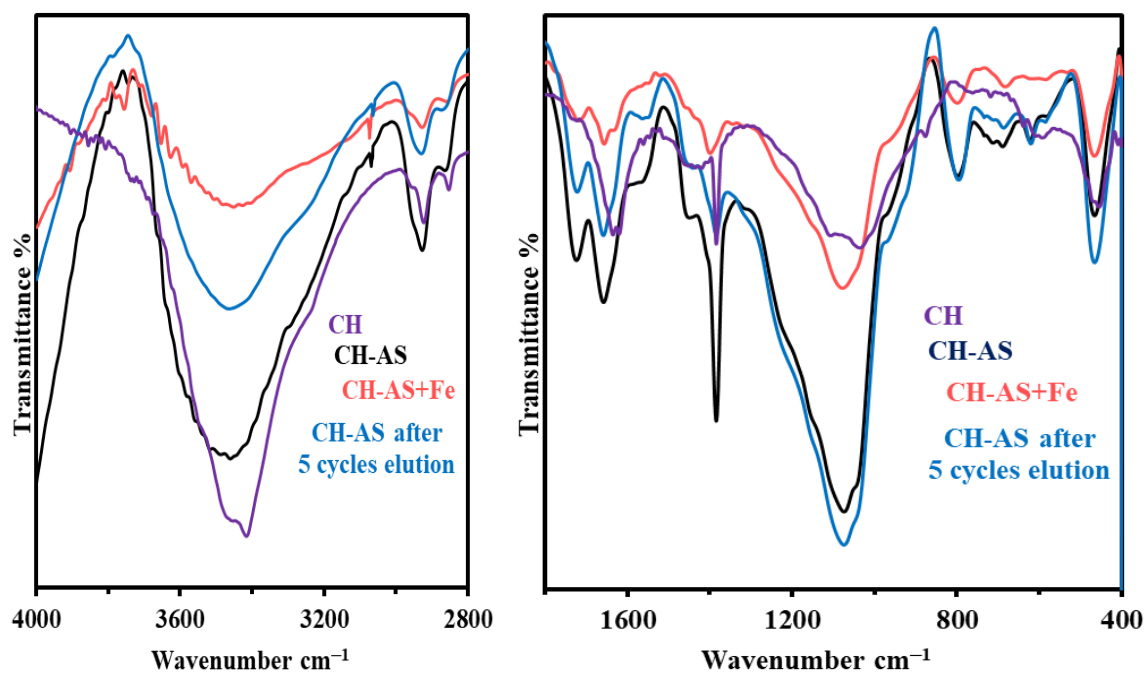

**Figure S1.** FTIR characterization of CH, CH-AS, after loading by Fe(III) and after 5<sup>th</sup> cycles of sorption desorption (scale 400–1800 and 2800–4000  $\text{cm}^{-1}$ ).

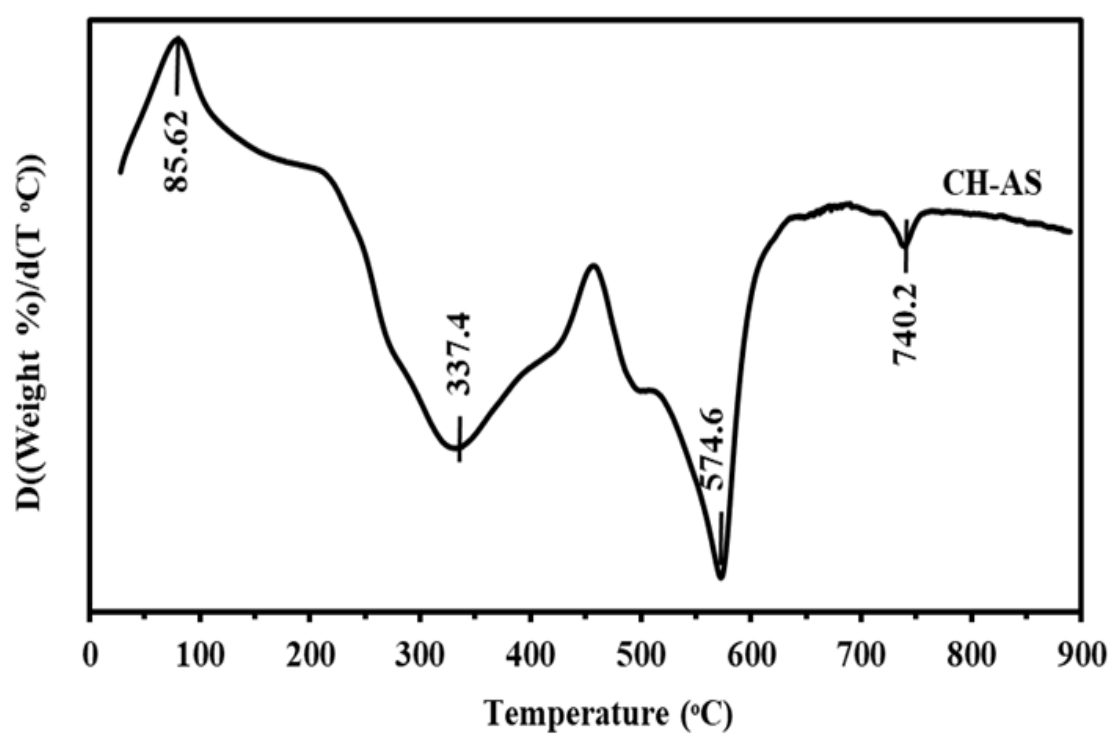

Figure S2. DrTGA of the functionalized chitosan composite.

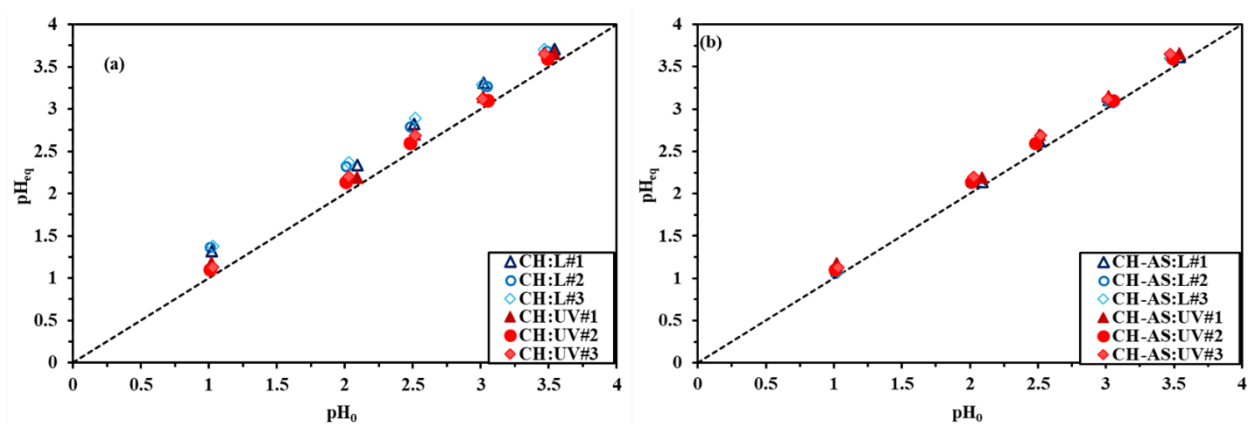

Figure S3. pH variation of the CH (a) and CH-AS (b) in the presence of Light and UV.

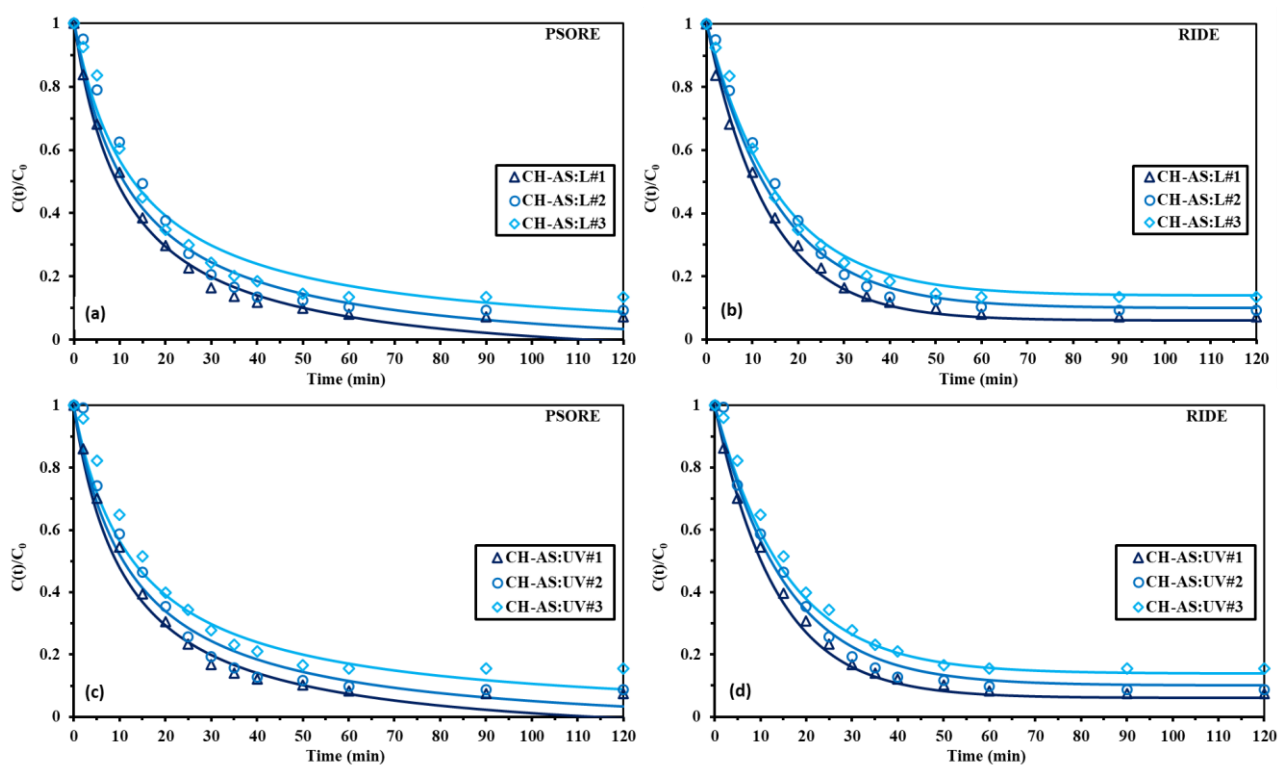

Figure S4. Uptake kinetics; PSORE (a and c) and RIDE (b and d) at light and UV emission.

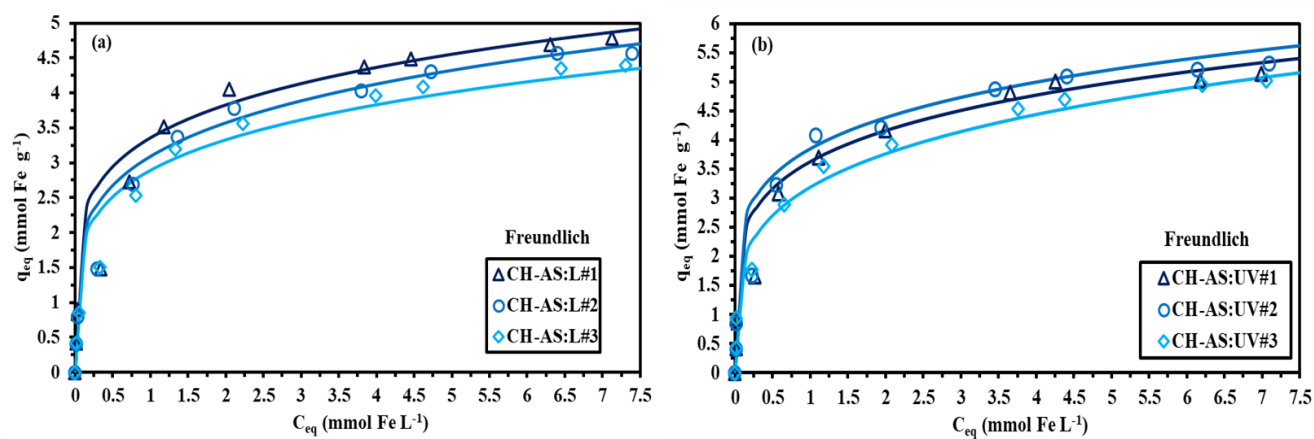

**Figure S5.** Sorption isotherms for unfitting the experimental data of Fe(III) sorption by Freundlich at light (a) and UV effect (b).



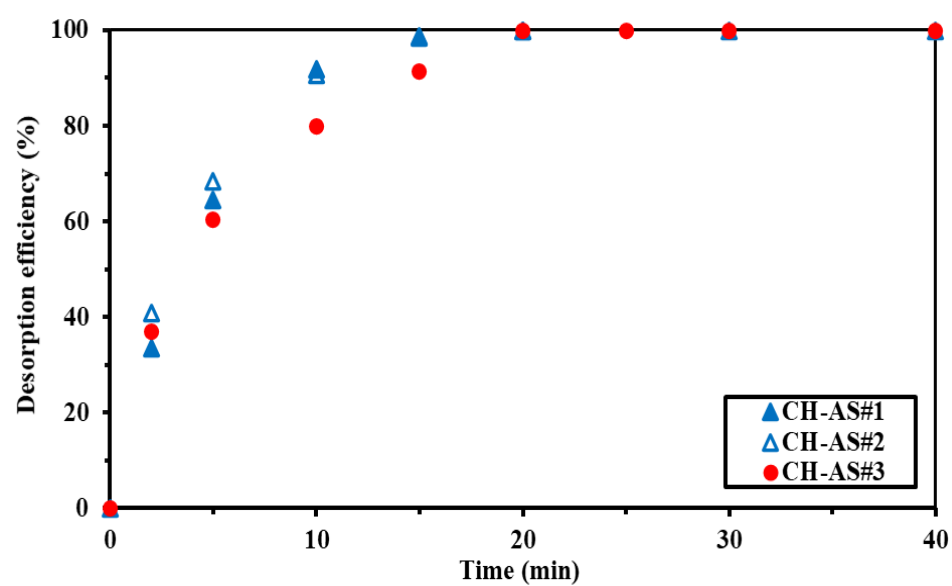

Figure S6. Desorption kinetics of the functionalized sorbent for three repeated experiments.

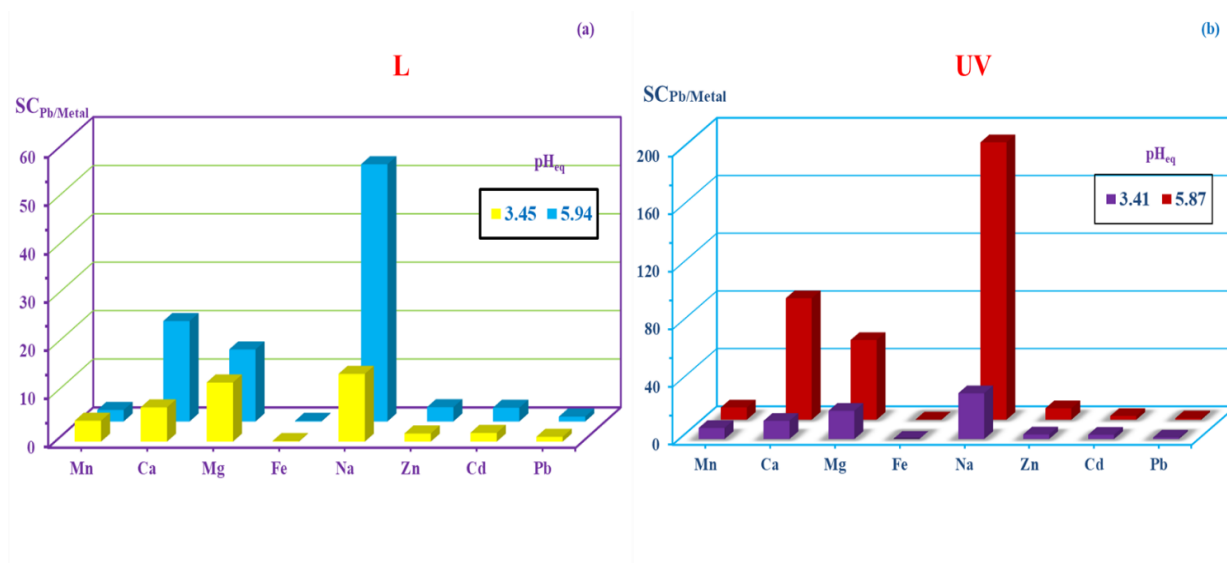

**Figure S7.** Selectivity coefficient for functionalized sorbent for Pb(II) vs. associated metal ions at light (a) and UV (b).

## References

1. Tien, C. *Adsorption Calculations and Modeling*; Butterworth-Heinemann: Newton, MA, 1994;; p. 243.
2. Ho, Y.S.; McKay, G. Pseudo-second order model for sorption processes. *Process Biochem.* **1999**, *34*, 451-465, doi:10.1016/S0032-9592(98)00112-5.
3. Crank, J. *The Mathematics of Diffusion*, 2nd. ed.; Oxford University Press: Oxford, U.K., 1975; p. 414.
4. Langmuir, I. The adsorption of gases on plane surfaces of glass, mica and platinum. *J. Amer. Chem. Soc.* **1918**, *40*, 1361-1402.
5. Freundlich, H.M.F. Uber die adsorption in lasungen. *Z. Phys. Chem.* **1906**, *57*, 385-470.
